# Supplementary material for: Decorin Core Protein (Decoron) Shape Complements Collagen Fibril Surface Structure and Mediates Its Binding
Source: PLOS journal article supplement (doi:10.1371/journal.pone.0007028), 2009-09-14
Supplement: S3 (10.1371/journal.pone.0007028.s003) [file journal.pone.0007028.s003]

| Decoron residues that bind collagen fibril surface |         |        | d-band: collagen residue (name, number, chain) |       |       | e <sub>1</sub> -band: collagen residue (name, number, chain) |       |       | d-band: energy of association |       |  | e <sub>r</sub> -band: energy of association |        |        | Decoron residues that bind collagen fibril surface |        |        |        |        |     |     |
|----------------------------------------------------|---------|--------|------------------------------------------------|-------|-------|--------------------------------------------------------------|-------|-------|-------------------------------|-------|--|---------------------------------------------|--------|--------|----------------------------------------------------|--------|--------|--------|--------|-----|-----|
| LRR                                                | residue | number | common                                         | wide  |       | common                                                       | wide  |       | common                        | wide  |  | common                                      | wide   |        | residue                                            | number | LRR    |        |        |     |     |
| N-term                                             | ILE     | 6      | K900A                                          |       |       | Q860B                                                        |       |       | -12.56                        |       |  |                                             |        |        | ILE                                                | 6      | N-term |        |        |     |     |
|                                                    | GLY     | 7      | K900C                                          | G665A |       |                                                              |       |       | -8.41                         |       |  |                                             |        |        | GLY                                                | 7      |        |        |        |     |     |
|                                                    | GLU     | 9      | K890B                                          |       | K890B | N893B                                                        |       | R634A | R627B                         |       |  | -36.96                                      |        | -29.73 | -26.30                                             | GLU    |        | 9      |        |     |     |
|                                                    | GLU     | 10     |                                                |       | L891B | K890B                                                        | G892B |       |                               |       |  |                                             |        |        |                                                    | GLU    |        | 10     |        |     |     |
|                                                    | GLU     | 14     | L891B                                          |       | G899A | K900C                                                        |       | A870A | K871A                         | H863B |  | -9.12                                       |        | -34.96 | -9.44                                              | 19.84  |        | -10.12 | GLU    | 14  |     |
|                                                    | GLU     | 17     | R894B                                          |       |       |                                                              |       |       |                               |       |  | -16.38                                      |        |        |                                                    |        |        |        | GLU    | 17  |     |
|                                                    | ILE     | 18     | R893B                                          |       |       |                                                              |       |       |                               |       |  |                                             |        |        |                                                    |        |        |        | ILE    | 18  |     |
|                                                    | GLU     | 19     | R894B                                          | K900A |       | R894B                                                        |       | H863B | K864B                         |       |  | -6.25                                       | -12.98 | -7.22  |                                                    | -21.23 |        |        | GLU    | 19  |     |
|                                                    | PRO     | 20     |                                                |       |       | R894B                                                        |       |       |                               |       |  |                                             |        |        |                                                    |        |        |        | PRO    | 20  |     |
|                                                    | MET     | 21     | R894B                                          |       |       | R894B                                                        |       |       |                               |       |  |                                             |        |        |                                                    |        |        |        | MET    | 21  |     |
|                                                    | GLY     | 22     |                                                |       |       |                                                              |       |       | K871A                         |       |  |                                             |        |        |                                                    |        |        |        | GLY    | 22  |     |
|                                                    | PRO     | 23     | R894B                                          |       |       |                                                              |       |       | K871A                         |       |  |                                             |        |        |                                                    |        |        |        | PRO    | 23  |     |
|                                                    | VAL     | 24     | G902C                                          | R894B |       | R894B                                                        |       | D873A | R874A                         |       |  |                                             | -8.40  |        |                                                    | 8.00   |        |        | VAL    | 24  |     |
|                                                    | CYS     | 25     | D903C                                          | R660B |       |                                                              |       |       |                               |       |  |                                             |        |        |                                                    |        |        |        | CYS    | 25  |     |
|                                                    | PRO     | 26     |                                                |       |       |                                                              |       | T869B |                               |       |  |                                             |        |        |                                                    |        |        |        | PRO    | 26  |     |
|                                                    | ARG     | 28     | R904A                                          |       |       |                                                              |       |       |                               | E642A |  |                                             | -8.38  |        |                                                    |        |        |        | ARG    | 28  |     |
|                                                    | HIS     | 29     |                                                |       |       | R904C                                                        |       |       |                               |       |  |                                             |        |        |                                                    |        |        |        | HIS    | 29  |     |
|                                                    | GLN     | 30     | G902C                                          | R904A |       | G661B                                                        | R904C |       | R402C                         |       |  |                                             |        | -21.65 |                                                    | -12.31 |        |        | GLN    | 30  |     |
|                                                    | CYS     | 31     | R894B                                          |       |       | E659B                                                        | R894B |       |                               |       |  |                                             | -12.62 |        |                                                    |        |        |        | CYS    | 31  |     |
|                                                    | HIS     | 32     | R894B                                          |       |       | K664A                                                        |       |       | K871C                         |       |  |                                             | -11.10 |        |                                                    | -4.71  |        |        | HIS    | 32  |     |
|                                                    | 1       | LEU    | 33                                             | R894B |       |                                                              |       |       | K871C                         |       |  |                                             | -6.33  |        |                                                    | -15.67 |        |        | LEU    | 33  |     |
|                                                    |         | VAL    | 35                                             |       |       |                                                              |       |       |                               |       |  |                                             |        |        |                                                    |        |        |        | VAL    | 35  |     |
|                                                    |         | GLN    | 37                                             | G905A | R904A |                                                              |       |       | R867B                         | R402C |  |                                             |        |        |                                                    | -16.64 |        |        | -10.23 | GLN | 37  |
|                                                    |         | SER    | 39                                             |       |       |                                                              |       |       | E876C                         |       |  |                                             |        |        |                                                    |        |        |        | SER    | 39  |     |
|                                                    |         | LYS    | 48                                             |       |       | D903C                                                        |       |       |                               |       |  |                                             |        |        | -14.62                                             |        |        |        | LYS    | 48  |     |
|                                                    | 2       | ASP    | 58                                             |       |       |                                                              |       |       | R867B                         |       |  |                                             |        |        |                                                    | -5.89  |        |        |        | ASP | 58  |
|                                                    |         | GLN    | 60                                             |       |       | T907C                                                        | G905C |       | E876C                         |       |  |                                             |        |        |                                                    | -13.30 |        |        |        | GLN | 60  |
|                                                    |         | ASN    | 61                                             |       |       | T907C                                                        |       |       | E876C                         |       |  |                                             |        |        |                                                    |        |        |        |        | ASN | 61  |
|                                                    | 3       | HIS    | 79                                             |       |       | A898C                                                        |       |       | K864B                         |       |  |                                             |        |        |                                                    | -14.84 |        |        |        | HIS | 79  |
|                                                    | 4       | THR    | 80                                             |       |       | D903C                                                        |       |       |                               |       |  |                                             |        |        |                                                    |        |        |        |        | THR | 80  |
|                                                    |         | GLU    | 103                                            |       |       |                                                              |       |       | K871A                         |       |  |                                             |        |        |                                                    | -23.09 |        |        | -13.22 | GLU | 103 |
|                                                    |         | ARG    | 104                                            |       |       | D903C                                                        |       |       |                               |       |  |                                             |        |        |                                                    |        |        |        |        | ARG | 104 |
|                                                    | TYR     | 106    |                                                |       | K900C |                                                              |       |       |                               |       |  |                                             |        | -19.04 |                                                    |        |        | TYR    | 106    |     |     |
|                                                    | SER     | 108    |                                                |       | E906C |                                                              |       |       |                               |       |  |                                             |        |        |                                                    |        |        | SER    | 108    |     |     |
|                                                    | LYS     | 109    | P909A                                          |       | E906C |                                                              |       |       |                               |       |  |                                             |        |        |                                                    |        |        | LYS    | 109    |     |     |
| 5                                                  | GLU     | 125    |                                                |       | K900C |                                                              |       |       |                               |       |  |                                             |        |        |                                                    |        |        | GLU    | 125    |     |     |
|                                                    | ARG     | 127    |                                                |       |       |                                                              |       |       | E866B                         |       |  |                                             |        |        |                                                    |        |        | ARG    | 127    |     |     |
|                                                    | HIS     | 129    |                                                |       | R904C |                                                              |       |       |                               |       |  |                                             |        |        |                                                    |        |        | HIS    | 129    |     |     |
|                                                    | GLU     | 130    |                                                |       | R904C |                                                              |       |       |                               |       |  |                                             |        |        |                                                    |        |        | GLU    | 130    |     |     |
| 7                                                  | ARG     | 177    |                                                |       |       |                                                              |       |       |                               |       |  |                                             |        |        |                                                    |        |        | ARG    | 177    |     |     |
| 8                                                  | GLU     | 196    |                                                |       | K900A |                                                              |       | K864B |                               |       |  |                                             |        |        | -19.80                                             |        |        | GLU    | 196    |     |     |
|                                                    | HIS     | 198    |                                                |       | K900C |                                                              |       |       |                               |       |  |                                             |        |        |                                                    |        |        | HIS    | 198    |     |     |
|                                                    | ASP     | 200    |                                                |       |       |                                                              |       |       |                               |       |  |                                             |        |        |                                                    |        |        | ASP    | 200    |     |     |
| 9                                                  | LYS     | 220    | G905A                                          | D903A |       | D903C                                                        |       |       |                               |       |  |                                             |        |        |                                                    |        |        | LYS    | 220    |     |     |
| 10                                                 | ARG     | 243    | D903A                                          |       |       | G899C                                                        |       | D873C |                               |       |  |                                             |        |        | 5.20                                               |        |        | ARG    | 243    |     |     |
|                                                    | GLU     | 244    | K900C                                          |       |       | K900A                                                        |       | R867B | K871A                         |       |  |                                             |        | -31.59 | -7.27                                              | -42.89 |        | GLU    | 244    |     |     |
|                                                    | HIS     | 246    |                                                |       |       |                                                              |       |       |                               |       |  |                                             |        |        |                                                    |        |        | HIS    | 246    |     |     |
|                                                    | ASN     | 248    |                                                |       |       |                                                              |       | E876C |                               |       |  |                                             |        |        | -10.31                                             |        |        | ASN    | 248    |     |     |
|                                                    | ASN     | 249    |                                                |       |       |                                                              |       | E876C |                               |       |  |                                             |        |        |                                                    |        |        | ASN    | 249    |     |     |
| 11                                                 | GLN     | 266    | K900C                                          |       | R894B |                                                              |       | K871A |                               |       |  |                                             |        |        | -9.10                                              |        |        | GLN    | 266    |     |     |
|                                                    | TYR     | 269    | D903C                                          |       | D903C |                                                              |       |       |                               |       |  |                                             |        |        |                                                    |        |        | TYR    | 269    |     |     |
|                                                    | ASN     | 272    | A910A                                          |       |       |                                                              |       |       |                               |       |  |                                             |        |        |                                                    |        |        | ASN    | 272    |     |     |
|                                                    | TRY     | 288    |                                                |       |       |                                                              |       |       |                               |       |  |                                             |        |        |                                                    |        |        | TRY    | 288    |     |     |
|                                                    | SER     | 294    | R894B                                          |       |       |                                                              |       |       |                               |       |  |                                             |        |        |                                                    |        |        | SER    | 294    |     |     |
| 12                                                 | TYR     | 295    | R894B                                          |       |       |                                                              |       |       |                               |       |  |                                             |        |        |                                                    |        |        | TYR    | 295    |     |     |
|                                                    | SER     | 296    | R894B                                          | G902C |       | R894B                                                        |       | E866B | R874C                         | D873B |  |                                             |        |        |                                                    |        |        | SER    | 296    |     |     |
|                                                    | TYR     | 307    | V903B                                          |       |       | G908A                                                        | A902B |       | A880A                         | A406C |  |                                             |        |        |                                                    |        |        | TYR    | 307    |     |     |
|                                                    | SER     | 313    |                                                |       |       |                                                              |       | E866B |                               |       |  |                                             |        |        |                                                    |        |        | SER    | 313    |     |     |
|                                                    | ARG     | 316    |                                                |       |       |                                                              |       |       |                               |       |  |                                             |        |        |                                                    |        |        | ARG    | 316    |     |     |
|                                                    | CYS     | 317    |                                                |       |       |                                                              |       |       |                               |       |  |                                             |        |        |                                                    |        |        | CYS    | 317    |     |     |
|                                                    | TYR     | 319    |                                                |       |       |                                                              |       |       |                               |       |  |                                             |        |        |                                                    |        |        | TYR    | 319    |     |     |
|                                                    | VAL     | 320    | A898C                                          |       |       |                                                              |       | K864B |                               |       |  |                                             |        |        |                                                    |        |        | VAL    | 320    |     |     |
|                                                    | ARG     | 321    | D903A                                          |       |       | D903A                                                        |       | D873A | E866B                         | K864B |  |                                             |        |        |                                                    |        |        | ARG    | 321    |     |     |
|                                                    | ALA     | 323    | R894B                                          |       |       |                                                              |       |       |                               |       |  |                                             |        |        |                                                    |        |        | ALA    | 323    |     |     |
|                                                    | VAL     | 324    |                                                |       |       | R660B                                                        |       | K864B |                               |       |  |                                             |        |        |                                                    |        |        | VAL    | 324    |     |     |
|                                                    | GLN     | 325    | R894B                                          | R660B |       | R660B                                                        |       |       |                               |       |  |                                             |        |        |                                                    |        |        | GLN    | 325    |     |     |
|                                                    | LEU     | 326    | R894B                                          |       |       |                                                              |       |       |                               |       |  |                                             |        |        |                                                    |        |        | LEU    | 326    |     |     |
|                                                    | GLY     | 327    | D903C                                          |       |       |                                                              |       | R874A |                               |       |  |                                             |        |        |                                                    |        |        | GLY    | 327    |     |     |
|                                                    | TYR     | 329    | D903C                                          |       |       | R904C                                                        |       | R874A | T869B                         |       |  |                                             |        |        |                                                    |        |        | TYR    | 329    |     |     |

## Table S1

Principal decoron-collagen interactions. Decoron to collagen amino acid interactions are shown on the left, the matching positions (and colored highlights) on the right half of the table correspond to the calculated energy of association. Highlighted residues correspond to those that rank amongst the top 20 electrostatic pairs within one of the four conformations displayed (common and wide for the *d* and *e*<sub>1</sub> band binding sites). Although the non-highlighted residues were estimated to contribute no more than -4.5 kJ/mol (which includes the desolvation cost), they were nevertheless estimated to form persistent H-bonds and cumulatively contribute to ligand-receptor stability.
